# Supplementary figures and images for: An IMPLICATION logic gate based on citrate-capped gold nanoparticles with thiocyanate and iodide as inputs
Source: Royal Society of Chemistry journal article supplement (doi:10.1039/c3an01520c), 2013-01-01

## Supporting Information

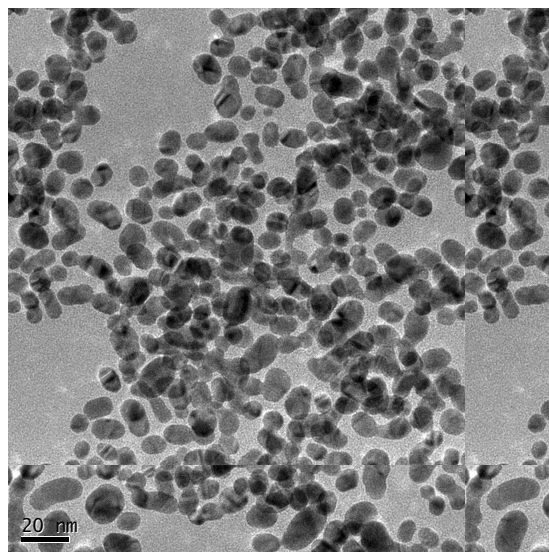

Fig. S1. TEM image of the citrate-capped gold nanoparticles.

Supplement: c3an01520c.pdf [file c3an01520c.pdf]
